# Supplementary material for: Chromatographic property classification of narrowly distributed ZnS quantum dots
Source: Royal Society of Chemistry journal article supplement (doi:10.1039/d0nr03890c), 2020-01-01
Supplement: d0nr03890c1.pdf [file d0nr03890c1.pdf]

Supporting Information

# Chromatographic property classification of narrowly distributed ZnS quantum dots

*Sebastian Süß<sup>a,b</sup>, Katja Bartsch<sup>a</sup>, Christina Wasmus<sup>a</sup>, Cornelia Damm<sup>a,b</sup>, Doris Segets<sup>c</sup> and  
Wolfgang Peukert<sup>a,b,\*</sup>*

<sup>a</sup>Institute of Particle Technology (LFG), Friedrich-Alexander-Universität Erlangen-Nürnberg  
(FAU), Cauerstr. 4, 91058 Erlangen, Germany.

<sup>b</sup>Interdisciplinary Center for Functional Particle Systems (FPS), Friedrich-Alexander-Universität  
Erlangen-Nürnberg (FAU), Haberstraße 9a, 91058 Erlangen, Germany.

<sup>c</sup>Process Technology for Electrochemical Functional Materials, and Center for Nanointegration  
Duisburg-Essen (CENIDE), University of Duisburg-Essen (UDE), Carl-Benz-Straße 199, 47057  
Duisburg, Germany.

Corresponding Author:

\* E-mail: [Wolfgang.Peukert@fau.de](mailto:Wolfgang.Peukert@fau.de); Phone: +49 9131 85 29401.

**CONTENT:**

|               |                                                                                                                                |           |
|---------------|--------------------------------------------------------------------------------------------------------------------------------|-----------|
| <b>SI 1.</b>  | <b>Parameters for ICP-OES measurements .....</b>                                                                               | <b>3</b>  |
| <b>SI 2.</b>  | <b>Interactions of NPs and stationary phase.....</b>                                                                           | <b>3</b>  |
| <b>SI 3.</b>  | <b>Normalized extinction spectra of ZnS QDs after chromatographic experiment at different buffer concentration .....</b>       | <b>5</b>  |
| <b>SI 4.</b>  | <b>Extinction spectra of ZnS QDs of coarse and fine fraction for different switching times of the fraction collector .....</b> | <b>7</b>  |
| <b>SI 5.</b>  | <b>Mass fractions for classification experiments with varying flow rate obtained by ICP-OES.....</b>                           | <b>8</b>  |
| <b>SI 6.</b>  | <b>Mass-weighted band gap distributions measured for ZnS QDs at different flow rates.....</b>                                  | <b>9</b>  |
| <b>SI 7.</b>  | <b>Mass fractions for classification experiments with varying switching times obtained by ICP-OES.....</b>                     | <b>11</b> |
| <b>SI 8.</b>  | <b>Mass-weighted band gap distributions measured for ZnS QDs at different switching times.....</b>                             | <b>12</b> |
| <b>SI 9.</b>  | <b>Mass fractions for classification experiments with varying temperatures obtained by ICP-OES.....</b>                        | <b>14</b> |
| <b>SI 10.</b> | <b>Mass-weighted band gap distributions measured for ZnS QDs at different temperatures .....</b>                               | <b>15</b> |

## SI 1. Parameters for ICP-OES measurements

Table SI 1: Parameters used for ICP-OES analysis.

|                                 | Flow rate / ml min <sup>-1</sup> |
|---------------------------------|----------------------------------|
| Sample                          | 0.6                              |
| Plasma gas (Ar)                 | 10,000                           |
| Atomizing gas (Ar)              | 600                              |
| Auxiliary gas (N <sub>2</sub> ) | 200                              |

## SI 2. Interactions of NPs and stationary phase

The interactions between ZnS QDs and stationary phase materials (SPMs) play a decisive role for the success of chromatographic classification of NP by size. Therefore, we investigated the adhesion of ZnS QDs ( $x_{1,3} = 1.8\text{nm}$ ) on potential SPMs prior any chromatographic studies within the HPLC system using shaking experiments. Additionally, those studies allowed us to monitor the long-term stability of NPs against agglomeration while being in contact with SPMs. Figure SI 2\_1 depicts the time-dependent normalized extinction of ZnS QDs at a wavelength of the extinction maximum of 259 nm ( $E_{259\text{nm}}(t)$ ) for the adhesion experiments on SPM 1 and SPM 2. As can be seen in Figure SI 2\_1, for both SPMs (SPM 1: black dots, SPM 2: blue squares), the normalized extinction of ZnS QDs stays almost constant over the whole experimental period of six days. The slight fluctuations can be explained by the experimental errors.

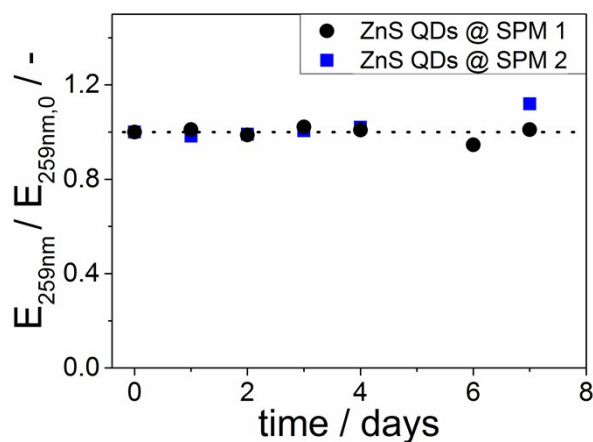

Figure SI 2\_1: Normalized extinction at 259 nm over six days during shaking experiments of ZnS QDs ( $x_{1,3} = 1.8$  nm) in contact with SPM 1 particles (black dots) and SPM 2 particles (blue squares).

Therefore, no significant irreversible adhesion of ZnS QDs to both SPMs takes place. Hence, in general both materials would be suitable for the chromatographic separation of ZnS QDs. Noteworthy, the extinction spectra obtained in the adhesion experiments shown in Figure SI 2\_2 also exclude any change in PSD due to agglomeration or ripening of the ZnS QDs. In this work and out of comparability reasons, we chose SPM 2 which we also used in our previous study on AuNPs. Thus, similar SPMs can be used for different types of particles and allow a direct comparison of the separation efficiency of ZnS QDs and AuNPs.

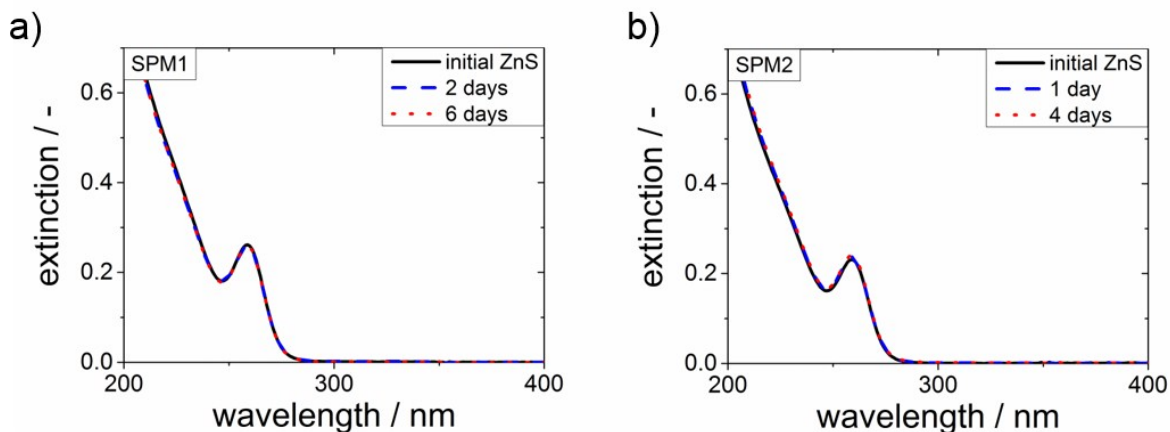

Figure SI 2\_2: Extinction spectra of ZnS QDs recorded during adhesion experiments using (a) stationary phase 1 and (b) stationary phase 2.

**SI 3. Normalized extinction spectra of ZnS QDs in  $\text{Na}_2\text{HPO}_4$  buffer of different concentration before and after chromatographic experiment at different buffer concentration**

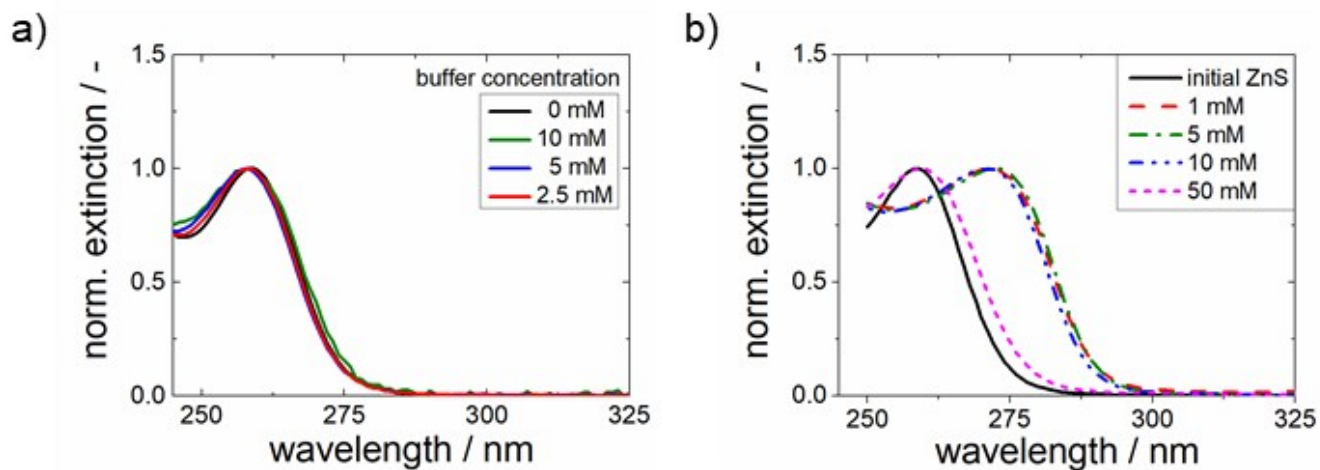

Figure SI 3: Normalized extinction spectra of ZnS QDs ( $x_{1,3} = 1.8 \text{ nm}$ ) a) before and b) after chromatographic experiment measured for different  $\text{Na}_2\text{HPO}_4$  buffer concentrations between 1 and 50 mM at a flow rate of  $1 \text{ ml min}^{-1}$  using  $20 \mu\text{l}$

*injection volume. The complete retention peak was collected as one fraction using the fraction collector.*

**SI 4. Extinction spectra of ZnS QDs of coarse and fine fraction for different switching times of the fraction collector**

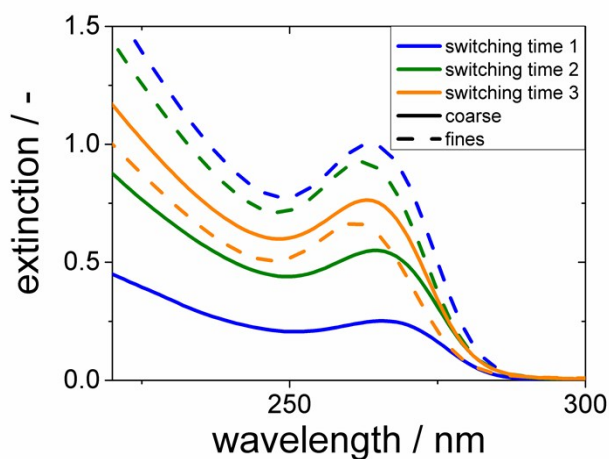

*Figure SI 4: Extinction spectra of obtained coarse and fine fractions after the chromatographic experiment for different switching times of the fraction collector (1: 21.5 min; 1: 22.5 min; 3: 23.1 min) using a 50 mM Na<sub>2</sub>HPO<sub>4</sub> buffer at a flow rate of 0.3 ml min<sup>-1</sup> and a 20 µl injection volume and a detection wavelength of 250 nm.*

**SI 5. Mass fractions for classification experiments with varying flow rate obtained by ICP-OES**

*Table SI 5: Obtained coarse and fine fractions for chromatographic experiments using the fraction collector.*

| Flow rate / ml min <sup>-1</sup> | Switching at retention peak maximum |       |
|----------------------------------|-------------------------------------|-------|
|                                  | coarse                              | Fines |
| 0.2                              | 0.39                                | 0.61  |
| 0.3                              | 0.36                                | 0.64  |
| 0.5                              | 0.28                                | 0.72  |
| 1.0                              | 0.37                                | 0.63  |



**SI 6. Mass-weighted band gap distributions measured for ZnS QDs at different flow rates**

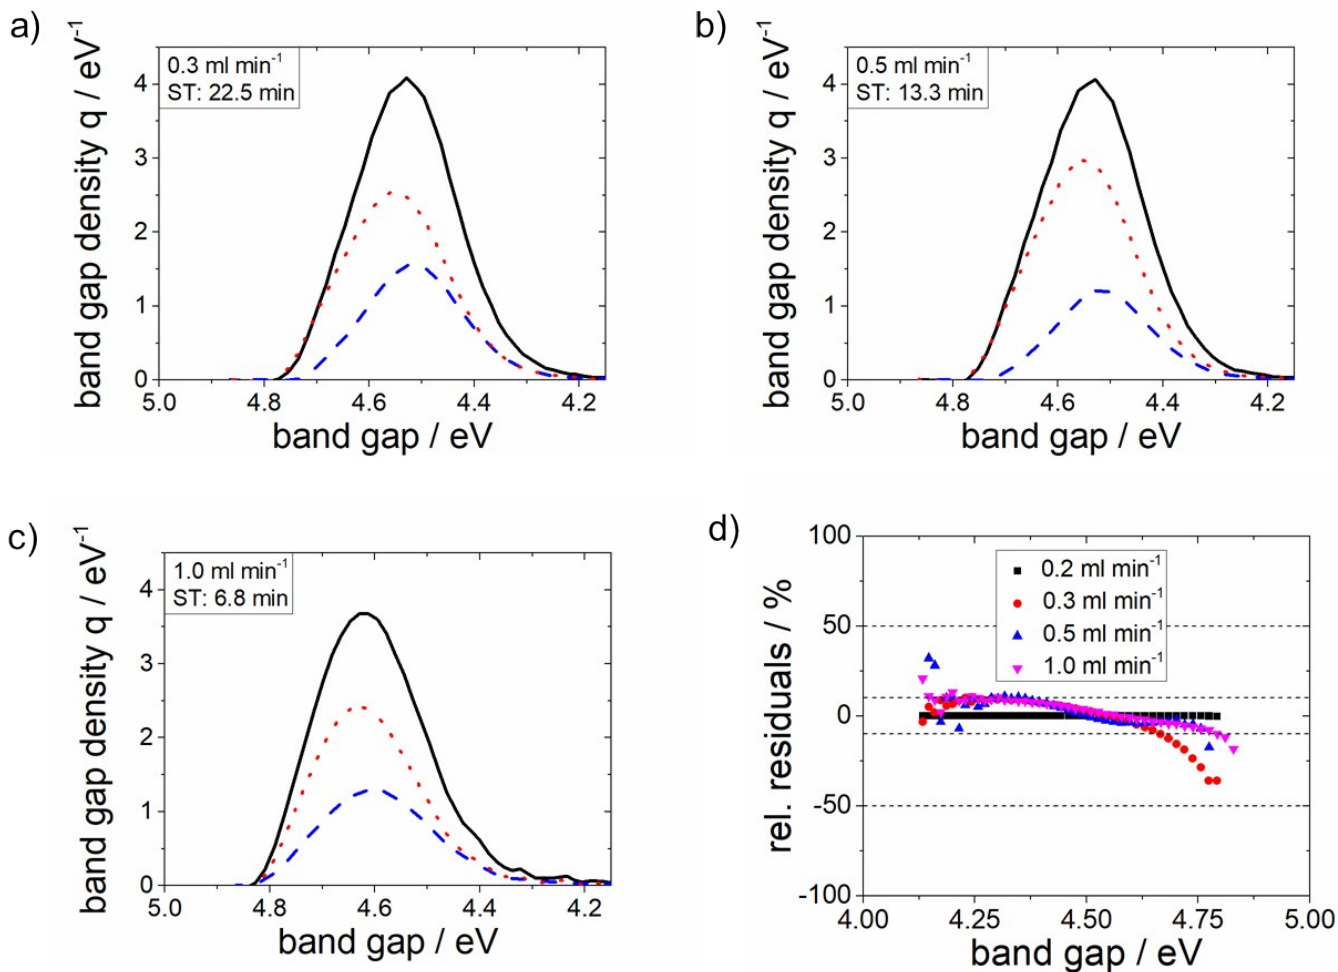

*Figure SI 6: Band gap distributions of feed ZnS QDs (black solid line) and mass-weighted band gap distributions of coarse (blue dashed line) and fines (red dotted line) for switching of the fraction collector in maximum of chromatogram at a flow rate of (a) 0.3 ml min<sup>-1</sup>, (b) 0.5 ml min<sup>-1</sup> and (c) 1.0 ml min<sup>-1</sup>. (d) shows the residuals  $q(\text{feed}) - (g \cdot q(\text{coarse}) + f \cdot q(\text{fines}))$  relative to  $q(\text{feed})$  as a measure for the degree of fulfilling the mass balance. If the mass balance is perfectly*

*fulfilled the residuals are 0. The horizontal dashed lines in (d) at  $\pm 10\%$  and  $\pm 50\%$ , respectively, are guides for the eye to get a faster impression of the order of magnitude of the relative residuals.*

**SI 7. Mass fractions for classification experiments with varying switching times obtained by ICP-OES**

*Table SI 7: Obtained coarse and fine fractions at different STs for chromatographic experiments using the fraction collector.*

|                                         | Switching time<br>21.5 min |       | Switching time<br>22.5 min |       | Switching time<br>23.1 min |       |
|-----------------------------------------|----------------------------|-------|----------------------------|-------|----------------------------|-------|
|                                         | coarse                     | finer | coarse                     | finer | coarse                     | finer |
| Flow rate / ml min <sup>-1</sup><br>0.3 | 0.14                       | 0.86  | 0.36                       | 0.64  | 0.50                       | 0.50  |

**SI 8. Mass-weighted band gap distributions measured for ZnS QDs at different switching times**

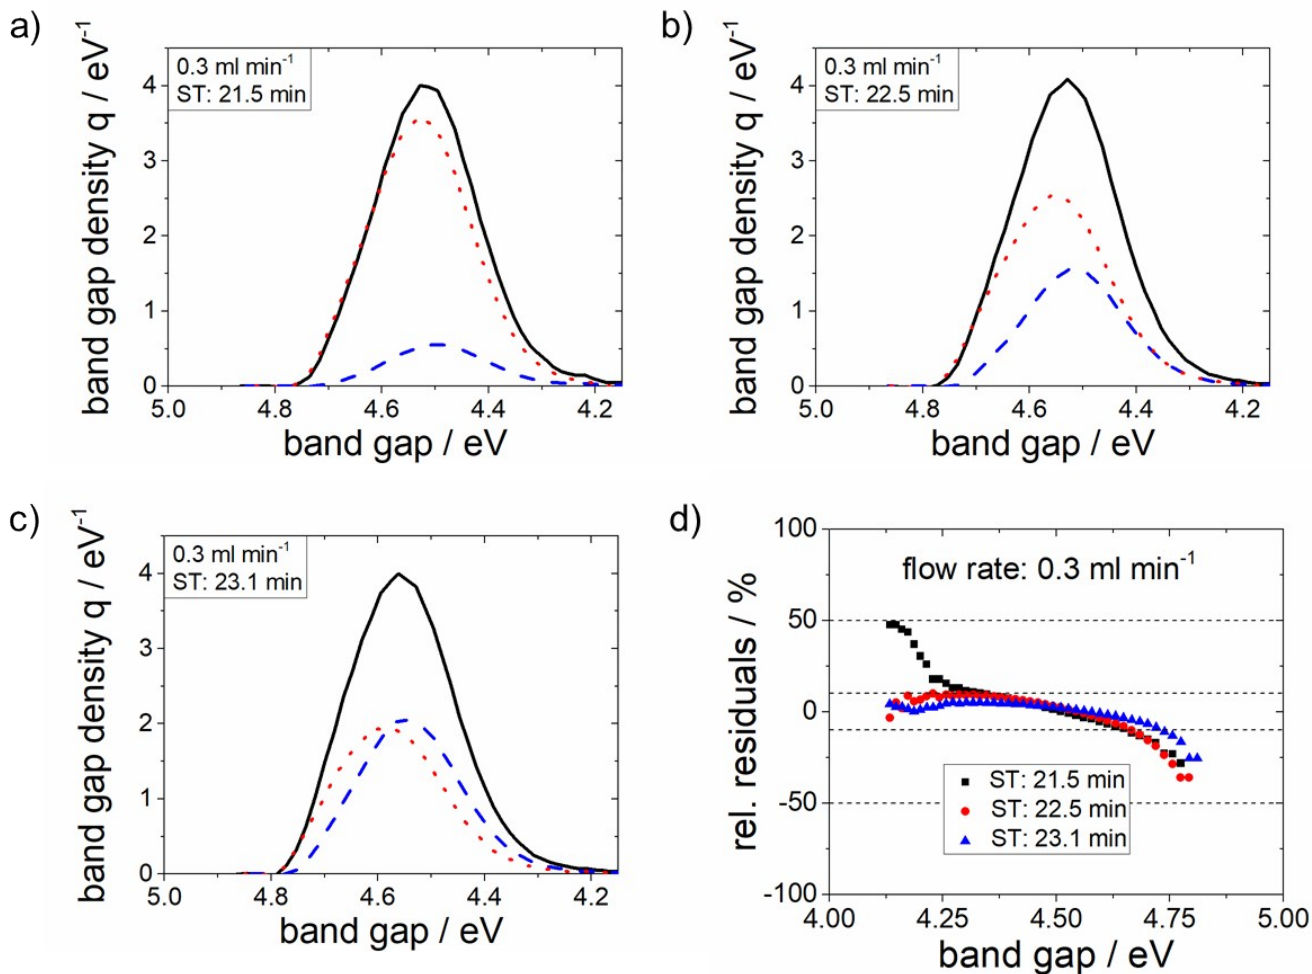

Figure SI 8: Band gap distribution of feed ZnS QDs (black solid line) and mass-weighted band gap distribution of coarse (blue dashed line) and fines (red dotted line) at a flow rate of 0.3 ml min<sup>-1</sup> for switching time (a) 21.5 min, (b) 22.5 min and (c) 23.1 min. (d) shows the residuals  $q(\text{feed}) - (g \cdot q(\text{coarse}) + f \cdot q(\text{fines}))$  relative to  $q(\text{feed})$  as a measure for the degree of fulfilling the mass balance. If the mass balance is perfectly fulfilled the residuals are 0. The horizontal dashed lines in

*(d) at  $\pm 10\%$  and  $\pm 50\%$ , respectively, are guides for the eye to get a faster impression of the order of magnitude of the relative residuals.*

**SI 9. Mass fractions for classification experiments with varying temperature obtained by ICP-OES**

*Table SI 7: Obtained coarse and fine fractions at different STs for chromatographic experiments using the fraction collector.*

| Flow rate / ml min <sup>-1</sup> | Temperature<br>7°C |       | Temperature<br>20°C |       | Temperature<br>40°C |       |
|----------------------------------|--------------------|-------|---------------------|-------|---------------------|-------|
|                                  | coarse             | finer | coarse              | finer | coarse              | finer |
| 0.3                              | 0.27               | 0.73  | 0.23                | 0.77  | 0.40                | 0.60  |

**SI 10. Mass-weighted band gap distributions measured for ZnS QDs at different temperature**

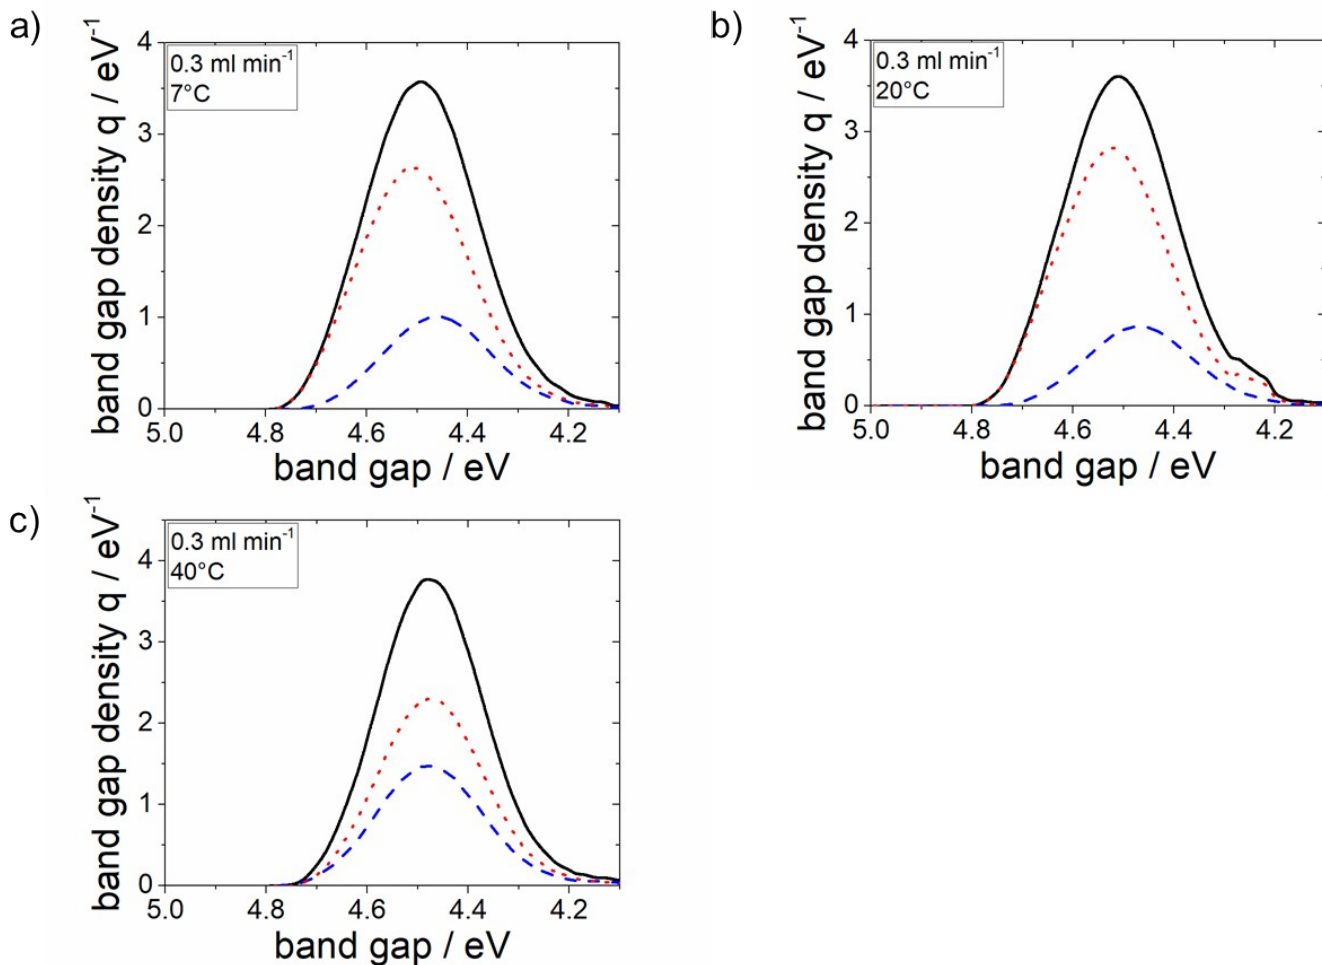

*Figure SI 10: Band gap distribution of feed ZnS QDs (black solid line) and mass-weighted band gap distribution of coarse (blue dashed line) and fines (red dotted line) at a flow rate of 0.3 ml min<sup>-1</sup> for temperature (a) 7°C, (b) 20°C and (c) 40°C. The switching time of the fraction collector was always set to retention peak maximum.*

## SI 11. FTIR spectrum of the ZnS QDs

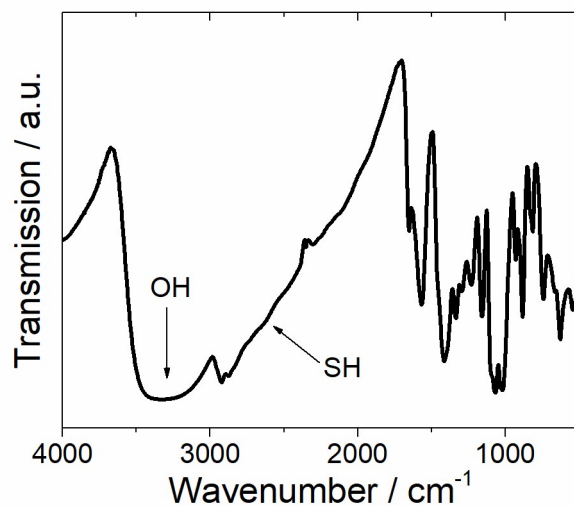

Figure SI 11: FTIR spectrum of the ZnS QD powder, the broad peak between 3500 and 2000  $\text{cm}^{-1}$  indicates  $-\text{OH}$  and  $-\text{SH}$  stretch vibrations and thus, the presence of the capping agent 3-mercapto-1,2-propanediol (TG).



## ABBREVIATIONS

|         |                                                          |
|---------|----------------------------------------------------------|
| ICP-OES | Inductively coupled plasma optical emission spectrometry |
| PSD     | Particle size distribution                               |
| QDs     | Quantum dots                                             |
| SEC     | Size-exclusion chromatography                            |
| SPM     | Stationary phase material                                |

## SYMBOLS

### Latin symbols

|       |                                              |           |
|-------|----------------------------------------------|-----------|
| $f$   | Relative mass of the fine fraction           | -         |
| $g$   | Relative mass of the coarse fraction         | -         |
| $q_f$ | Band gap distribution of the fine fraction   | $eV^{-1}$ |
| $q_F$ | Band gap distribution of the feed            | $eV^{-1}$ |
| $q_g$ | Band gap distribution of the coarse fraction | $eV^{-1}$ |
